# Supplementary material
Source: Springer Nature journal article supplement (https://mijn.bsl.nl/resource/supplementary/13047_2012_469_MOESM3_ESM.pdf/7111622)

a.

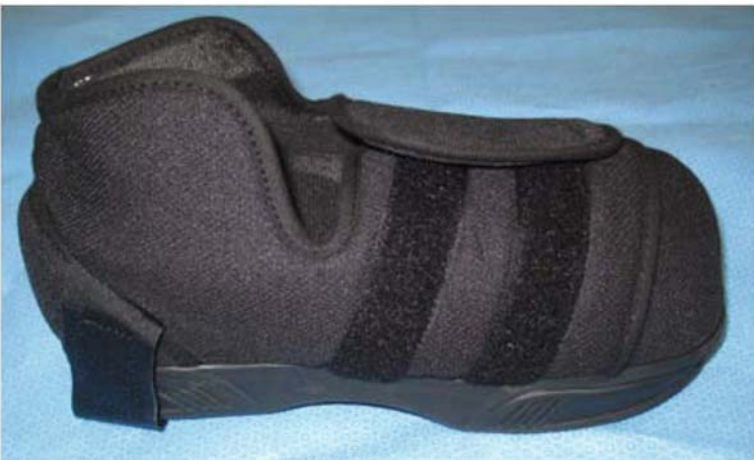

b.

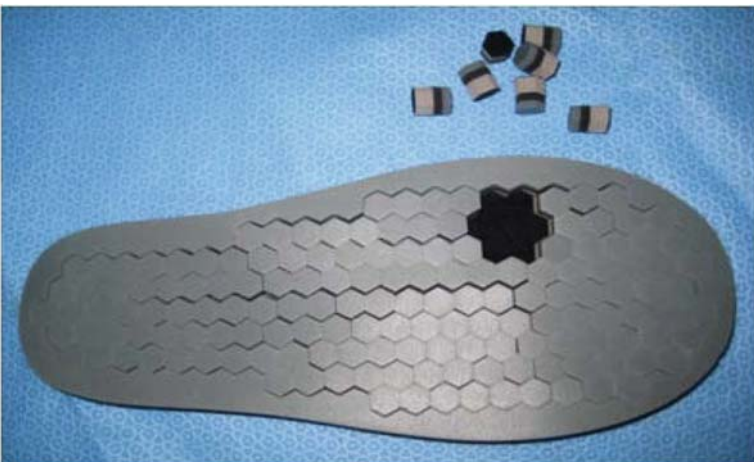

Supplement: MOESM3 [file 7111622]
